# Whole-genome sequencing of three native cattle breeds originating from the northernmost cattle farming regions

1 Melak Weldenegodguad<sup>1,2</sup>, Ruslan Popov<sup>3</sup>, Kisun Pokharel<sup>1</sup>, Innokentyi Ammosov<sup>4</sup>, Ming  
2 Yao<sup>5</sup>, Zoya Ivanova<sup>3</sup> and Juha Kantanen<sup>1\*</sup>

3 <sup>1</sup>Production Systems Department, Natural Resources Institute Finland (Luke), Jokioinen, Finland

4 <sup>2</sup>Department of Environmental and Biological Sciences, University of Eastern Finland, Kuopio,  
5 Finland

6 <sup>3</sup>Yakutian Research Institute of Agriculture (FGBNU Yakutskij NIISH), Yakutsk, Russia

7 <sup>4</sup>Board of Agricultural Office of Eveno-Bytantaj Region, Batagay-Alyta, Russia

8 <sup>5</sup>BGI-Shenzhen, Shenzhen, China

9 \* **Correspondence:**

10 Juha Kantanen

11 juha.kantanen@luke.fi

12 **Keywords: adaptation, demographic history, Finncattle, indels, selective sweeps, SNPs, WGS,**  
13 **Yakutian cattle**

14 **Abstract**

15 Northern Fennoscandia and the Sakha Republic in the Russian Federation represent the northernmost  
16 regions on Earth where cattle farming has been traditionally practiced. In this study, we performed  
17 whole-genome resequencing to genetically characterize three rare native breeds Eastern Finncattle,

18 Western Finncattle and Yakutian cattle adapted to these northern Eurasian regions. We examined the  
19 demographic history, genetic diversity and unfolded loci under natural or artificial selection. On  
20 average, we achieved 13.01-fold genome coverage after mapping the sequencing reads on the bovine  
21 reference genome (UMD 3.1) and detected a total of 17.45 million single nucleotide polymorphisms  
22 (SNPs) and 1.95 million insertions-deletions (indels). We observed that the ancestral species (*Bos*  
23 *primigenius*) of Eurasian taurine cattle experienced two notable prehistorical declines in effective  
24 population size associated with dramatic climate changes. The modern Yakutian cattle exhibited a  
25 higher level of within-population variation in terms of number of SNPs and nucleotide diversity than  
26 the contemporary European taurine breeds. This result is in contrast to the results of marker-based  
27 cattle breed diversity studies, indicating assortment bias in previous analyses. Our results suggest that  
28 the effective population size of the ancestral Asiatic taurine cattle may have been higher than that of  
29 the European cattle. Alternatively, our findings could indicate the hybrid origins of the Yakutian  
30 cattle ancestries and possibly the lack of intensive artificial selection. We identified a number of  
31 genomic regions under selection that may have contributed to the adaptation to the northern and  
32 subarctic environments, including genes involved in disease resistance, sensory perception, cold  
33 adaptation and growth. By characterizing the native breeds, we were able to obtain new information  
34 on cattle genomes and on the value of the adapted breeds for the conservation of cattle genetic  
35 resources.

## 36 **Introduction**

37 During their 8,000-10,000 years of domestication, taurine cattle (*Bos taurus*) have adapted to a wide  
38 variety of biogeographic zones and sociocultural environments as a result of natural and human-  
39 derived selection (Feliuss, 1995). Fennoscandia along with northwestern Russia and the region of  
40 Sakha (Yakutia) in eastern Siberia, are the northernmost territories where cattle farming has had a  
41 relatively long tradition as the livelihood of local people (Kopoteva and Partanen, 2009; Bläuer and

42 Kantanen, 2013; Cramp et al., 2014; Egorov et al., 2015). In prehistoric and historic times, animal  
43 husbandry faced several challenges in these northern climatic conditions, such as short summers and  
44 limited vegetation resources for feeding during the long winters, and this practice required well-  
45 adapted animals that were suited to the available environmental resources and socioeconomic and  
46 cultural conditions (Kantanen et al., 2009a; Bläuer and Kantanen, 2013; Egorov et al., 2015).

47 Cattle breeds such as Eastern Finncattle, Icelandic cattle, Swedish Mountain cattle, Yakutian cattle  
48 and other northern native cattle breeds are assumed to have their origins in the near-eastern  
49 domesticated taurine cattle that once spread to these northern regions (Kantanen et al., 2000, 2009a;  
50 Li et al., 2007). Herd books, pedigree registers and breeding associations were established in the late  
51 19th and early 20th centuries. Early native breeds had a pivotal socioeconomic role in dairy and beef  
52 production in the northern Eurasian regions but have been almost exclusively replaced by  
53 commercial international cattle populations bred for high-input, high-output farming systems.  
54 Exceptions to this trend are Yakutian cattle in Siberia and Icelandic cattle, which continue to have  
55 high regional importance in food production (Kantanen et al., 2000, 2009a). The conservation of the  
56 genetic resources of native, typically low-profit breeds is often motivated by the fact that these breeds  
57 may possess valuable genetic variations for future animal breeding and to address the challenges that  
58 animal production will face during adaptation to future conditions, brought about by factors such as  
59 climate change (Odegård et al., 2009; Boettcher et al., 2010; Kantanen et al., 2015). In addition,  
60 breeds such as Yakutian cattle exhibit adaptation in demanding environments and may be extremely  
61 useful for enabling animal production in marginal regions (Kantanen et al., 2015).

62 Previous studies on the characterization of cattle genetic resources in northern Eurasian breeds have  
63 used various methods to study within-breed genetic diversity, population structure, demographic  
64 factors and interbreed relationships, e.g., autosomal and Y-chromosomal microsatellites,  
65 mitochondrial D-loop and whole-genome SNP-marker scans (Li et al., 2007; Kantanen et al., 2009b;

66 Iso-Touru et al., 2016). These studies have indicated, for example, the genetic distinctiveness of the  
67 native northern European cattle breeds (e.g., the Finnish native breeds and Yakutian cattle) from  
68 modern commercial dairy breeds (such as the Finnish Ayrshire and Holstein breeds). In addition, a  
69 whole-genome SNP genotyping analysis detected genomic regions targeted by selection, which, for  
70 example, contain immune-related genes (Iso-Touru et al., 2016). Whole-genome sequencing (WGS)-  
71 based approaches provide additional possibilities for investigation of the genetic diversity of  
72 livestock breeds adapted to various biogeographic regions and production environments. Moreover,  
73 recent advancements in bioinformatics and statistical tools have enhanced our understanding of the  
74 demographic evolution of domestic animal species, the possible role of genomic structural variations  
75 in the adaptation of livestock breeds in the course of domestication and selection and the biological  
76 functions of these genomic variations (Gutenkunst et al., 2009; Li and Durbin, 2011; Alachiotis et al.,  
77 2012; Pavlidis et al., 2013; Wang et al., 2014b; Librado et al., 2015).

78 To expand our knowledge of genomic variations in northern Eurasian taurine cattle, we performed  
79 whole-genome resequencing of five animals from each of three northern native breeds, namely,  
80 Eastern Finncattle, Western Finncattle and Yakutian cattle (Figure 1). We examined the genetic  
81 diversity and population structures of the breeds and identified chromosomal regions and genes under  
82 selection pressure. We also studied the demographic history of the northern Eurasian taurine cattle by  
83 using the whole-genome sequence data.

## 84 **MATERIALS AND METHODS**

### 85 **Ethics statement**

86 Blood samples of animals for DNA extraction were collected by using a protocol approved by the  
87 Animal Experiment Board of MTT Agrifood Research Finland (currently the Natural Resources

88 Institute Finland, Luke) and the Board of Agricultural Office of Eveno-Bytantaj Region, Sakkyryr,  
89 Sakha, Russia.

#### 90 **DNA sample preparation and sequencing**

91 DNA extracted from blood samples was available for the two Finnish cattle breeds (Eastern  
92 Finncattle and Western Finncattle) and one Siberian breed (Yakutian cattle) from a previous study  
93 (Li et al., 2007). Five unrelated individuals from each breed (14 females and one Yakutian cattle bull)  
94 were examined. Genomic DNA was extracted using a standard phenol/chloroform-based protocol  
95 (Malke, 1990). For sequencing library preparation following the manufacturer's specifications, the  
96 genomic DNA of each individual was fragmented randomly. After electrophoresis, DNA fragments  
97 of desired length were gel purified. One type of library was constructed for each sample (500 bp  
98 insert size); 15 paired-end DNA libraries were constructed for the 15 samples. Adapter ligation and  
99 DNA cluster preparation were performed, and the DNA was subjected to Illumina HiSeq 2000  
100 sequencing using the  $2 \times 100$  bp mode at Beijing Genomics Institute (BGI). Finally, paired-end  
101 sequence data were generated. To ensure quality, the raw data was modified by the following 2 steps:  
102 first, the contaminating adapter sequences from the reads were deleted, and then, the reads that  
103 contained more than 50% low-quality bases (quality value $\leq$ 5) were removed.

#### 104 **Short read alignment and mapping**

105 For short read alignment, the bovine reference genome (UMD 3.1), including regions that were not  
106 assembled into chromosomes (Zimin et al., 2009), were downloaded from the Ensembl database  
107 release 71 (Flicek et al., 2013) and indexed using SAMtools v0.1.19 (Li et al., 2009). Paired-end 100-  
108 bp short reads from each individual sample were mapped against the bovine reference genome  
109 assembly UMD 3.1 using BWA v0.7.5a with the default parameters. After mapping, for downstream  
110 SNP and insertion-deletion (indel) detection, the SAM files that were generated from BWA were

111 converted to the corresponding binary equivalent BAM files and sorted simultaneously using  
112 SortSam.jar in Picard tools v1.102 (<http://picard.sourceforge.net/>). We used Picard tools to remove  
113 PCR duplicates from the aligned reads and then used the uniquely mapped reads for variant calling.

#### 114 **SNP and indel detection**

115 We used the Genome Analysis Toolkit (GATK) v2.6-4 according to the GATK best practices  
116 pipeline (McKenna et al., 2010; DePristo et al., 2011; Van der Auwera A. et al., 2013) for  
117 downstream SNP and indel calling. We used RealignerTargetCreator to identify poorly mapped  
118 regions (nearby indels) from the alignments and realigned these regions using IndelRealigner. Next,  
119 the UnifiedGenotyper was used to call SNPs and indels with a Phred scale quality greater than 30.  
120 After SNP calling, we used VariantFiltration to discard sequencing and alignment artifacts from the  
121 SNPs with the parameters “MQ0  $\geq$  4 && ((MQ0 / (1.0 \* DP)) > 0.1)”, “SB  $\geq$  -1.0, QUAL < 10”, and  
122 “QUAL < 30.0 || QD < 5.0 || HRun > 5 || SB > -0.10” and from the indels with the parameters "QD <  
123 2.0 ", "FS > 200.0" and "ReadPosRankSum < -20.0". All the variants that passed the above filtering  
124 criteria were used in the downstream analysis and compared to the cattle dbSNP148 (Van der  
125 Auwera A. et al., 2013) to identify novel variants.

#### 126 **SNP and indel annotation and gene ontology analysis**

127 ANNOVAR (Wang et al., 2010) was used to annotate the functions of the variants (exonic, intronic,  
128 5' and 3' UTRs, splicing, intergenic) using Ensembl release 71. SNPs that were identified in the  
129 exonic regions were classified as synonymous or nonsynonymous SNPs. In recent studies, numerous  
130 phenotypes have been associated with the genes containing the highest number of nonsynonymous  
131 SNPs (nsSNPs) (Kawahara-Miki et al., 2011; Li et al., 2014). We performed gene ontology (GO)  
132 analysis for genes containing nsSNPs and indels using the GO Analysis Toolkit and Database for  
133 Agricultural Community (AgriGO) (Du et al., 2010). In this analysis, we selected genes containing

134 >5 nsSNPs for each breed. The significantly enriched GO terms were assessed by Fisher's exact test  
135 with the Bonferroni correction using default parameters (P-value, 0.05; at least 5 mapping entries).  
136 Out of four indel classes (frameshift, nonframeshift, stopgain and stoploss), we annotated frameshift  
137 indels in exonic regions using default parameters in ANNOVAR. Frameshift indels may change  
138 amino acid sequences and thereby affect protein function.

### 139 **Identification and annotation of selective sweeps**

140 We investigated the signatures of selection using site frequency spectrum (SFS)-based  $\alpha$  statistics in  
141 SweeD (Pavlidis et al., 2013) with default parameters, except setting the grid as the only parameter.  
142 SweeD detects the signature of selection based on the composite likelihood ratio test (CLR) using  
143 SFS-based statistics. SweeD was run separately for each chromosome by setting the grid parameter at  
144 5-kb equidistant positions across the chromosome (size of the chromosome/5 kb). We used BEAGLE  
145 program ver.4 (Browning and Browning, 2007) to impute missing alleles and infer the haplotype  
146 phase for all individual Western Finncattle, Yakutian cattle and Eastern Finncattle simultaneously  
147 (among the Eastern Finncattle, we excluded one inbred animal; see Results). The BEAGLE program  
148 infers the haplotype information of each chromosome, which is required for  $\alpha$  statistics. Following  
149 the approaches described in previous studies (Wang et al., 2014b; McManus et al., 2015), we selected  
150 the outliers falling within the top 0.5% of the CLR distribution. The cutoff value for  $\alpha$  statistics was  
151 taken as the 99.5 percentile of the empirical distribution of the 5-kb equidistant positions across the  
152 genome for each chromosome. Annotation of the candidate sites that exhibited a signal of selection  
153 was performed using Ensembl BioMart (Kinsella et al., 2011) by considering a 150-kb sliding  
154 window on the outlier sites. Candidate genes exhibiting signatures of selection were subjected to GO  
155 analysis with same parameters applied in the variant annotation using AgriGO.

### 156 **Population genetics analysis**

157 The average pairwise nucleotide diversity within a population ( $\pi$ ) and the proportion of polymorphic  
158 sites (Watterson's  $\theta$ ) were computed using the Bio::PopGen::Statistics package in BioPerl (v1.6.924)  
159 (Stajich et al., 2002). Principal component analysis (PCA) was conducted using smartpca in  
160 EIGENSOFT3.0 software (Patterson et al., 2006) on biallelic autosomal SNPs that were genotyped in  
161 all individuals. Significant eigenvectors were determined using Tracy-Widom statistics with the  
162 twstats program implemented in the same EIGENSOFT package.

### 163 **Demographic history inference**

164 We used the pairwise sequentially Markovian coalescent (PSMC) model (Li and Durbin, 2011) to  
165 construct the demographic history of the three breeds. For the analysis, one individual per breed with  
166 highest sequence depth was selected to explore changes in local density of heterozygous sites across  
167 the cattle genome. The following default PSMC parameters were set:  $-N25$ ,  $-t15$ ,  $-r5$  and  $-p$   
168  $'4+25*2+4+6'$ . To scale the PSMC output to real time, we assumed a neutral mutation rate of  $1.1 \times$   
169  $10^{-8}$  per generation and an average generation time of 5 years (Kumar and Subramanian, 2002;  
170 Murray et al., 2010; MacLeod et al., 2013). As the power of the PSMC approach to reconstruct recent  
171 demographic history is not reliable (Li and Durbin, 2011; MacLeod et al., 2013; Zhao et al., 2013),  
172 we reconstructed a more recent demographic history of the Finnish and Yakutian populations using  
173 the diffusion approximation for demographic inference ( $\partial a \partial i$ ) program (dadi-1.6.3) (Gutenkunst et  
174 al., 2009). We used the intergenic sites from the identified SNPs in the 15 individuals to compute the  
175 folded SFS. We merged the results for the Eastern and Western Finncattle breeds, as these breeds  
176 exhibited similar genetic diversity measures (Figure S4). Since we had 10 Finncattle and 5 Yakutian  
177 samples, we downscaled the Finncattle sample size to be equal to that of the Yakutian cattle. We ran  
178 the  $\partial a \partial i$  algorithm multiple times to ensure convergence and selected the optimal parameters with the  
179 highest likelihood as the final result. As  $\partial a \partial i$  requires ancestral population size ( $N_a$ ), we calculated  
180  $N_a$  using the formula  $N_a = \theta / 4\mu L$ , where  $\theta$  was the observed number of segregating sites divided by



181 the sum of the expected SFS using the best-fit parameters of our model,  $L$  was the effective sequence  
182 length, and  $\mu$  was the mutation rate per generation per site. We used a mutation rate of  $1.0 \times 10^{-8}$   
183 mutations per generation assuming that one generation was equal to 5 years (Kumar and  
184 Subramanian, 2002), and the effective sequence length (intergenic regions) was 10,836,904. We  
185 calculated population size and divergence time between the Finnish and Yakutian populations based  
186 on NA. Finally, using the parameters described previously, we generated the demographic model  
187 using  $\hat{\theta}$  as shown in Figure S5. The optimal model identified the change from the ancestral  
188 population size (NA) to the effective population size ( $n_{ua}$ ) from the time  $T_a$  to the time  $T_d$ .  $T_a$  was  
189 the time period when the change in NA started and  $T_d$  was the time when the divergence between the  
190 Finnish and Yakutian cattle occurred.  $n_{u1F}$  and  $n_{u2Y}$  were the effective population sizes during the  
191 split. To calculate the statistical confidence in the estimated parameter values, we estimated the  
192 parameter uncertainties using the Hessian method (a.k.a. the Fisher information matrix).

## 193 **RESULTS**

### 194 **Sequence data**

195 A total of 521 gigabases (Gb) of paired-end DNA sequence data was obtained after removing adapter  
196 sequences and low-quality reads (Table 1, Table S1). On average, each sample had 347.4 million (M)  
197 reads, 98.45% of which were successfully mapped to the bovine reference genome UMD3.1 (Table  
198 1, Table S1), representing 12.38-fold coverage.

### 199 **Identification and annotation of variants**

200 A total of 17.45 M SNPs were detected in the mapped reads across all 15 samples, with Yakutian  
201 cattle exhibiting the highest number of SNPs (Table 2, Figure 2a, Table S2). The average number of  
202 SNPs detected per individual within the breeds was 5.73 M, 6.03 M and 7.12 M in Eastern Finncattle,  
203 Western Finncattle and Yakutian cattle, respectively (Table S2). A total of 6.3 M (36.1%) SNPs were

204 shared by the three breeds, and as expected, the Finnish breeds shared the highest number (n=8.06 M,  
205 46.2%) of SNPs (Figure 1a). Moreover, we found that 1.85 M SNPs (16.83%) in Eastern Finncattle,  
206 1.60 M (15.15%) in Western Finncattle and 3.96 M (32.33%) in Yakutian cattle were private SNPs in  
207 our data (Figure 2a). The transition-to-transversion (TS/TV) ratios were 2.20 and 2.23 in the  
208 Finncattle and Yakutian cattle, respectively (Table S2). The observed Ts/Tv ratios were consistent  
209 with those observed in previous studies in mammalian systems (Lachance et al., 2012; Choi et al.,  
210 2013, 2014), indicating the quality of our SNP data.

211 Of the SNPs identified in our analysis, 1.28 M (6.9%) SNPs were found to be novel when compared  
212 to NCBI dbSNP bovine build 148. At the breed level, 3.1%, 2.8% and 5.3% of the total SNPs in the  
213 Eastern Finncattle, Western Finncattle and Yakutian cattle, respectively, were novel. Furthermore,  
214 out of the novel SNPs identified for each breed, 278,399 (82.57%), 235,741(80.72%) and 618,717  
215 (94.85%) were breed-specific SNPs in Eastern Finncattle, Western Finncattle and Yakutian cattle  
216 (Figure 2b), respectively. A summary of the homozygous and heterozygous SNPs is given in Tables  
217 S2 and S3. One Eastern Finncattle cow (sample\_3 in Table S3) exhibited exceptionally low diversity,  
218 with only 1.66 M (32.58%) heterozygous and 3.44 M (67.42%) homozygous SNPs. This animal  
219 originated from an isolated, inbred herd and represented one relict Eastern Finncattle line (herd) that  
220 passed through the breed's demographic bottleneck (Kantanen et al., 2000). After excluding this  
221 sample, the average number of SNPs detected per Eastern Finncattle individual was 5.88 M, and the  
222 Eastern Finncattle animals exhibited 2.63 M (44.83%) homozygous and 3.24 M (55.17%)  
223 heterozygous SNPs, with a ratio of 1:1.23 (homozygous:heterozygous). Apparently, the number of  
224 homozygous SNPs in the Eastern Finncattle was higher than that in the other two breeds.

225 In total, we detected 2.12 M indels, 79.8% of which were found in the dbSNP build 148, with 20.2%  
226 being novel (Figure 2C, Table S2). At the breed level, 13.0%, 11.7% and 16.1% of the total indels in  
227 the Eastern Finncattle, Western Finncattle and Yakutian cattle, respectively, were novel.

228 In our data, on average, 0.65% of the SNPs were detected in exonic regions, 25.1% in intronic  
229 regions, 72.6% in intergenic regions, and 1.65% in UTRs and in regions upstream and downstream of  
230 genes (Table 2 and Table S4). In general, all the three breeds exhibited similar distributions of SNPs  
231 in various functional categories. A total of 76,810, 71,256 and 84,927 exonic SNPs were identified in  
232 the Eastern Finncattle, Western Finncattle and Yakutian cattle, respectively. Of the exonic SNPs in  
233 the Eastern Finncattle, Western Finncattle and Yakutian cattle, 31,299, 29,035 and 33,111,  
234 respectively, were nonsynonymous SNPs (nsSNPs) (Table 2) and were found in 10,309, 9,864 and  
235 10,429 genes, respectively.

236 The functional categories of the indel mutations are presented in Table 2 and Table S4. In total,  
237 1,045, 927 and 1,148 of the indels were frameshift indels that were associated with 808, 770 and 895  
238 genes in Eastern Finncattle, Western Finncattle and Yakutian cattle, respectively (Supplementary  
239 Data 1, 2 and 3).

#### 240 **GO analysis of the SNPs and indels**

241 GO enrichment analysis of 1,331, 1,170 and 1,442 genes containing >5 nsSNPs (Supplementary Data  
242 4, 5 and 6), identified 111, 113 and 95 significantly enriched GO terms in Eastern Finncattle,  
243 Western Finncattle and Yakutian cattle, respectively (Supplementary Data 7, 8 and 9). A total of 38,  
244 43 and 38 GO terms were associated with biological processes in Eastern Finncattle, Western  
245 Finncattle and Yakutian cattle, respectively (Supplementary Data 7, 8, 9).

246 A detailed comparison of the biological processes associated with genes with >5 nsSNPs with the  
247 bovine Ensembl gene set (n=25,160) is shown in Figure S1. The GO enrichment analysis revealed  
248 that a majority of the significantly enriched GO terms were shared by the three cattle breeds.  
249 “Response to stimulus, GO:00050896” was associated with approximately 50% of the genes in  
250 Eastern Finncattle (n=611), Western Finncattle (n =544) and Yakutian cattle (n=629) (see Figure S1).

251 In addition, this analysis showed that in each breed, a large number of genes were associated with  
252 immune functions, such as “Immune response, GO:0006955”, “Defense response, GO:0006952”,  
253 “Antigen processing and presentation, GO:0019882”, and “Immune system process, GO:0002376”.  
254 Among the three breeds, the Yakutian cattle had more enriched genes associated with immune  
255 functions than the two Finncattle breeds. On the other hand, in the Finncattle breeds, a large number  
256 of genes were associated with sensory perception functions, such as “Sensory perception,  
257 GO:0007600”, “Sensory perception of smell, GO:0007608” and “Detection of chemical stimulus  
258 involved in sensory perception, GO:0050907”. In Yakutian cattle, none of the GO terms associated  
259 with sensory perception were enriched. However, 55 genes associated with “Developmental growth,  
260 GO: 0048589” were enriched in only Yakutian cattle.

261 We further identified the top genes, namely, *TTN*, *PKHD1*, *GPR98* and *ASPM*, that had at least 40  
262 nsSNPs in all the breeds. These genes have large sizes; *TTN* is 274 kb in size, *PKHD1* is 455 kb,  
263 *GPR98* is 188 kb and *ASPM* is 64 kb. Among the genes with nsSNPs, *TTN* contained the highest  
264 number of nsSNPs: 68, 63 and 87 nsSNPs in Eastern Finncattle, Western Finncattle and Yakutian  
265 cattle, respectively. The *TTN* gene is present on chromosome 2 and is associated with meat quality  
266 (Sasaki et al., 2006; Watanabe et al., 2011).

267 A total of 709, 675 and 772 genes associated with frameshift indels in these breeds were linked to at  
268 least one GO term (Figure S2, Supplementary Data 10, 11 and 12). The results indicated that a  
269 majority of the significantly enriched GO terms were shared by the breeds. The GO terms “Defense  
270 response, GO:0006952” and “Female pregnancy, GO:0007565” were enriched exclusively in  
271 Yakutian cattle. In total, 96 genes were enriched in “Defense response, GO:0006952”.

272 **Selection signatures**

273 We identified 2,528 sites exhibiting signatures of selection in each breed, of which 58%, 61% and  
274 53% mapped to gene regions in Eastern Finncattle, Western Finncattle and Yakutian cattle,  
275 respectively (Figure S3). Information regarding the SNPs found in selective sweep regions in each  
276 breed is shown in Table S5.

277 Chromosome 1 exhibited the highest (n=159) number of selection signals and chromosome 25 the  
278 lowest (n=43). Considering a 150-kb window centered on the candidate site, Western Finncattle  
279 exhibited the highest number (n=371) of candidate genes with selection signatures, followed by  
280 Eastern Finncattle (n=331), while Yakutian cattle exhibited the lowest number (n=249)  
281 (Supplementary Data 13, 14 and 15). Apparently, 36 (Eastern Finncattle), 35 (Western Finncattle)  
282 and 20 (Yakutian cattle) candidate gene IDs lacked gene descriptions (Supplementary Data 16, 17  
283 and 18). Seven genes with greater than 5 nsSNPs in Eastern Finncattle (*CCSAP*, *CEP72*, *GBP5*,  
284 *LOC100297846*, *GBP2*, *LOC613867* and ENSBTAG00000045571), Western Finncattle (*CDH23*,  
285 *PCDHB4*, *PCDHB6*, *PCDHB7*, *SIRPB1*, *LOC783488* and ENSBTAG00000012326) and Yakutian  
286 cattle (*FERIL6*, *GBP5*, ENSBTAG00000015464, ENSBTAG00000025621, *GBP2*,  
287 ENSBTAG00000039016 and *LOC101902869*) exhibited the strongest signatures of selection. Of the  
288 genes with the strongest signatures of selection, one gene each from Eastern  
289 (ENSBTAG00000045571) and Western Finncattle (ENSBTAG00000012326) and three genes from  
290 Yakutian cattle (ENSBTAG00000015464, ENSBTAG00000025621, ENSBTAG00000039016)  
291 lacked gene descriptions (Table S6).

292 A total of 28, 67 and 13 GO terms were significantly enriched in Eastern Finncattle, Western  
293 Finncattle and Yakutian cattle, respectively (Supplementary Data 19, 20 and 21). We found only one  
294 significantly enriched GO term ("GMP binding, GO:0019002") that was shared by the three cattle  
295 breeds. The GO terms "Homophilic cell adhesion, GO:0007156", "Calcium-dependent cell-cell  
296 adhesion,GO:0016339" and "Multicellular organism reproduction, GO:0032504" were shared by the

297 Finncattle breeds. Most of the significantly enriched GO terms (23, 62 and 12 in Eastern Finncattle,  
298 Western Finncattle and Yakutian cattle, respectively) were ‘breed-specific’ in our data. In addition,  
299 we examined the significantly enriched GO terms that were potentially involved in cold adaptation  
300 by assuming that in extremely cold environments, energy requirement is high and fat and lipids are  
301 the main sources of energy (Liu et al., 2014). The levels of fatty acids, lipids and phospholipids  
302 typically increase with decreasing temperatures (Purać et al., 2011). The significantly enriched GO  
303 terms associated with Western Finncattle included "Lipid localization, GO:0010876", "Lipid  
304 digestion, GO:0044241", "Unsaturated fatty acid biosynthetic process, GO:0006636" and  
305 "Unsaturated fatty acid metabolic process, GO:0033559 ". However, no significantly enriched GO  
306 terms associated with fatty acid and lipid metabolism and biosynthesis were identified in Eastern  
307 Finncattle and Yakutian cattle.

308 We examined the candidate selective sweep genes in each breed. A number of genes potentially  
309 associated with cold adaptation (Cardona et al., 2014) were present in Eastern Finncattle (*DNAJC28*,  
310 *HSP90B1*, *AGTRAP*, *TAF7*, *TRIP13*, *NPPA* and *NPPB*), Western Finncattle (*CD14*, *COBL*,  
311 *JMJD1C*, *KCNMA1*, *PLA2G4*, *SERPINF2*, *SRA1* and *TAF7*) and Yakutian cattle (*DNAJC9*, *SOCS3*,  
312 *TRPC7*, *SLC8A1* *GLP1R*, *PKLR* and *TCF7L2*).

313 Among the selective sweep genes, there were several genes that have been previously shown to be  
314 associated with domestication-related changes, such as changes in disease resistance, neuronal and  
315 brain development, growth, meat quality, pigmentation, sensory perception and milk production  
316 (Gutiérrez et al., 2015). For example, the chromosomal regions exhibiting selective sweeps in  
317 Eastern Finncattle included genes associated with disease resistance (*IFNAR1*, *IFNAR2*, *IL10RB* and  
318 *NOD2*), neuronal and brain development (*OLIG1*), growth (*ACTA1*) and meat quality (*IGFBP5*,  
319 *NRAP*, *PC* and *SIPRI*) (Supplementary Data 13). In Western Finncattle, selective sweeps were  
320 detected in genes associated with pigmentation (*ULBP3*), sensory perception (*LOC521946*,

321 *LOC783558* and *LOC783323*), meat quality (*COX5B*, *KAT2B* and *ITGB3*) and disease resistance  
322 (*CD96*, *CD14*, *GZMB* and *IL17A*) (Supplementary Data 14). Similarly, selective sweep-influenced  
323 genes in Yakutian cattle were associated with disease resistance (*PFKM*, *ADAM17* and *SIRPA*),  
324 sensory perception (*OR13C8*, *LOC100336881*, *LOC101902265*, *LOC512488*, *LOC617388*,  
325 *LOC783884*, *LOC788031* and *LOC789957*), meat quality (*ALDH1B1*, *CAPNS1*, *COX7A1*, *PFKM*,  
326 *SLC8A1*, *SOCS3* and *THBS3*) and milk production (*MUC1*) (Supplementary Data 15).

### 327 **Population genetics analysis**

328 The overall genome-wide genetic diversity, as measured by Watterson's  $\theta$  and pairwise nucleotide  
329 diversity ( $\pi$ ), were higher in the Yakutian cattle ( $0.001588$  and  $1.728 \times 10^{-3}$ , respectively) than in  
330 Eastern Finncattle ( $0.001445$  and  $1.559 \times 10^{-3}$ , respectively) and Western Finncattle ( $0.001398$  and  
331  $1.512 \times 10^{-3}$ , respectively), and these results were inconsistent with those of previous studies based  
332 on autosomal microsatellite and SNP data sets, which showed that Finncattle were more diverse than  
333 the Yakutian cattle (Li and Kantanen, 2010).

334 We also applied PCA to examine the genetic relationships among the three cattle breeds. In the PCA  
335 plot, the Finncattle and Yakutian cattle were grouped in the first eigenvectors, indicating clear  
336 genetic differentiation (Figure S4). The inbred Eastern Finncattle animal grouped separately from the  
337 other Finncattle animals.

### 338 **Demographic population size history**

339 The PSMC profiles of the contemporary Finnish and Siberian native cattle were used to construct the  
340 demographic prehistory and evolution of ancestral populations of northern Eurasian cattle. As shown  
341 in Figure 3, the temporal PSMC profiles of the three cattle genomes followed a similar pattern. The  
342 ancestral species of northern Eurasian taurine cattle, the near-eastern aurochs (*Bos primigenius*)  
343 (Kantanen et al., 2009a), experienced two population peaks starting at  $\sim 1$  Mya and  $\sim 40$  kya and two

344 bottlenecks at ~250 kya and ~12 kya (Figure 3). After the first population expansion, the population  
345 size declined gradually. The second population expansion of the ancestral wild species began around  
346 ~80 kya and started to decline around ~30 kya, leading to a second bottleneck.

347 We also used the  $\partial a\partial i$  program to reconstruct the recent northern European cattle demographic  
348 history (from 418 kya to the present). The parameters  $T_a$ ,  $T_d$ ,  $n_{ua}$ ,  $n_{u1F}$  and  $n_{u2Y}$  in the  
349 demographic model are shown and explained in Figure S5 and Table S7. Based on this model, we  
350 estimated that the reference ancestral population size (NA) was 43,116. The optimal model fit for  
351 each parameter and confidence interval (CI) are shown in Table S7 by fixing NA at 43,116 and  
352 generation time at 5 years. Our best-fit model indicated that the ancestral population underwent a size  
353 change to 51,883 (CI, 51,658-52,108) at 418 kya (95% CI, 413.96-409.47 kya) (Table S7). This  
354 result is consistent with the PSMC profile (Figure 3). In addition, our model suggested that the  
355 divergence of North European native cattle and East Siberian turano-mongolicus type of cattle  
356 occurred 8,822 years ago (CI, 8,775-8,869 years ago).

## 357 **DISCUSSION**

358 To our knowledge, this is the first whole-genome sequence-based report on the genetic diversity of  
359 Eurasian native cattle (*B. taurus*) breeds that have adapted to the northernmost cattle farming regions,  
360 even subarctic regions. The contemporary genetic resources of the Eastern Finncattle, Western  
361 Finncattle and Yakutian cattle breeds studied are the result of a complex process of genetic and  
362 demographic events that occurred during the domestication and selection and even the evolution of  
363 the ancestral species of northern Eurasian taurine cattle, namely, the near-eastern aurochs (*B.*  
364 *primigenius*).

### 365 **Demographic evolution of *Bos primigenius***



366 As shown in Figure 3, the auroch species (*B. primigenius*) experienced two notable prehistorical  
367 population expansions, after which the population size declined gradually. The first marked decline  
368 in the effective population size ( $N_e$ ) occurred during the Middle Pleistocene period starting after ~1  
369 Mya, which may have been associated with reduction in global temperatures and even with negative  
370 actions of humans on the auroch population (Barnosky et al., 2004; Hughes et al., 2007). The second  
371 marked decline in  $N_e$  prior to domestication was obviously caused by dramatic climate changes  
372 during the last glacial maximum (Yokoyama et al., 2000). Although the sequencing depth attained in  
373 this study was not ideal for PSMC analysis (typically  $>20\times$ ), our observations regarding the temporal  
374 changes in the  $N_e$  of the aurochs during the Pleistocene period (Mei et al., 2018) followed the pattern  
375 observed for ancestral populations of several other domestic mammalian species, such as pig (*Sus*  
376 *scrofa*; (Groenen et al., 2012)), horse (*Equus caballus*; (Librado et al., 2016)) and sheep (*Ovis aries*;  
377 (Yang et al., 2016)). The  $\hat{\delta}a\hat{\delta}i$  results confirmed the past fluctuations in the prehistorical  $N_e$  of *B.*  
378 *primigenius* (Table S7), and the comparison of the current SNP-based estimated  $N_e$  of the present  
379 cattle breeds (~100; (Iso-Touru et al., 2016)) to the  $N_e$  of the corresponding early domesticated  
380 ancestral populations showed that there was a dramatic decline in the  $N_e$  during domestication and  
381 breed formation. In addition, our demographic analysis (Figure S5) provided new knowledge of the  
382 prehistory of northern Eurasian native cattle. As suggested by a previous study (Kantanen et al.,  
383 2009b), both the Finnish and Yakutian native cattle descended from the near-eastern aurochs  
384 domesticated 8,000-10,000 years ago. Here, our results have shown that the two northern Eurasian  
385 native cattle lineages may have already diverged in the early stage of taurine cattle domestication,  
386 more than 8,000 years ago.

### 387 **High genetic variability in the Yakutian cattle**

388 The total number of sequence variants identified on average in Eastern Finncattle and Western  
389 Finncattle animals (e.g., 5.88 M and 6.03 M SNPs, respectively, exhibiting a minor allele frequency

390 > 0.05) corresponded well to numbers found typically in European taurine animals. In contrast, we  
391 found that the Yakutian cattle exhibited a higher number of SNPs on average per individual (7.12 M  
392 SNPs) than the number of SNPs detected in European and Asiatic humpless cattle to date (Tsuda et  
393 al., 2013; Choi et al., 2014; Szyda et al., 2015). According to (Szyda et al., 2015) and studies cited  
394 therein, a European taurine animal may exhibit on average 2.06-6.12, 5.89-6.37, 5.85-6.40 and 5.93  
395 M SNPs, while (Choi et al., 2014) detected 5.81M SNPs in a Korean Holstein cattle individual, a  
396 breed that originated from western Europe and North America. Typically, it may be possible to detect  
397 additional SNPs by increasing the sequencing depth (Szyda et al., 2015). In addition to the average  
398 number of SNPs per individual, total number of SNPs and number of indels, the Yakutian cattle  
399 exhibited the highest number of exonic SNPs and nsSNPs among the three northern native breeds  
400 studied. However, although the Yakutian cattle had the highest number of nsSNPs and genes with >5  
401 nsSNPs, the functional annotation of the exonic SNPs by GO analysis indicated that the lowest  
402 number of significantly enriched GO terms was obtained for the Yakutian cattle.

403 Our estimates for the population-level diversity for the Eastern Finncattle, Western Finncattle and  
404 Yakutian cattle (the nucleotide diversity ( $\pi$ ) values were  $1.559 \times 10^{-3}$ ,  $1.512 \times 10^{-3}$  and  $1.728 \times 10^{-3}$ ,  
405 respectively, and the proportions of polymorphic sites ( $\theta$ ) were 0.001445, 0.001398 and 0.001588,  
406 respectively) exceed those typically found in European taurine cattle breeds (Kim et al., 2017; Chen  
407 et al., 2018; Mei et al., 2018). We observed that Yakutian cattle such as the Asiatic taurine cattle  
408 breeds exhibit high levels of genomic diversity in terms of  $\pi$  and  $\theta$  estimates. The typical nucleotide  
409 diversity values for the European taurine cattle are  $>1.0 \times 10^{-3}$ , while those for the Asiatic taurine  
410 breeds are closer to  $\sim 2.0 \times 10^{-3}$  than to  $1.0 \times 10^{-3}$  (Kim et al., 2017; Chen et al., 2018; Mei et al.,  
411 2018). We observed higher within-population diversity for the Yakutian cattle than that observed for  
412 several other taurine cattle breeds, which differs from previous estimates based on autosomal  
413 microsatellites and whole-genome SNP data (Li et al., 2007; Iso-Touru et al., 2016), where lower

414 levels of variation were observed in Yakutian cattle, indicating that the genetic variation in Yakutian  
415 cattle has been underestimated. The set of autosomal microsatellites recommended by FAO (the Food  
416 and Agricultural Organization of the United Nations) for biodiversity analysis of cattle breeds and the  
417 design of commercial SNP BeadChips used in cattle whole-genome genotyping were derived mainly  
418 from the genetic data of western breeds, causing a bias in the diversity estimates of clearly  
419 genetically distinct cattle breeds, such as Yakutian cattle (Li et al., 2007; Iso-Touru et al., 2016).

420 There could have been differences in the past effective population sizes of the European and Asiatic  
421 taurine cattle, and the present elevated genomic diversity of the Asiatic taurine cattle breeds may  
422 reflect the higher “ancient” effective sizes of the ancestral populations of the Asiatic taurine breeds  
423 (Chen et al., 2018). However, the prehistory of domesticated cattle in East Asia appears to be more  
424 complex than previously thought (Zhang et al., 2013; Gao et al., 2017; Chen et al., 2018), and an  
425 additional speculative explanation for the elevated genomic diversity in the Yakutian cattle and  
426 several other Asiatic taurine cattle breeds (or their ancestral populations) could be ancient  
427 introgression with the East Asian aurochs (*B. primigenius*) that lived in the East Asian region during  
428 the arrival of near-eastern taurine cattle (Chen et al., 2018). The previous mtDNA and Y-  
429 chromosomal diversity study indicated the near-eastern origins of the ancestral population of the  
430 Yakutian cattle (Kantanen et al., 2009b). The possible hybrid origins of the Yakutian cattle ancestries  
431 may have increased the genetic variation in the ancestral population of Yakutian cattle seen even in  
432 the current population and may have played a pivotal role in the process of adaptation of the  
433 Yakutian cattle to the subarctic environment in the Sakha Republic, eastern Siberia.

434 The high number of SNPs and high genomic diversity found in the Yakutian cattle may be due partly  
435 to the breed’s selection history: the artificial selection by humans has not been intensive (Kantanen et  
436 al., 2009b). The Yakutian cattle breed is an aboriginal taurine population, the gene pool of which has  
437 been shaped by natural and artificial selection. However, the centuries-old “folk selection” methods

438 and traditional knowledge for the selection of the most suitable animals for the challenging subarctic  
439 environment followed the methods used by local people rather than the breeding implemented by  
440 organizations or institutions (Kantanen et al., 2009a). When compared with the Western Finncattle  
441 and Eastern Finncattle in the present study, the Yakutian cattle exhibited distinctly low numbers of  
442 candidate genes that exhibited selection signatures (n=371, n=331 and n=249, respectively). Among  
443 these three breeds, Western Finncattle have been subjected to the most intensive artificial selection  
444 for milk production characteristics, while the production selection program of Eastern Finncattle was  
445 stopped in the 1960s, when the census population size of this native breed declined rapidly.  
446 Currently, *in vivo* and *in vitro* conservation activities are being implemented for Eastern Finncattle  
447 (and for Western Finncattle and Yakutian cattle). In addition, although Yakutian cattle had the  
448 highest number of genes containing SNPs (also nsSNPs) among the three breeds, the GO analysis  
449 indicated that this breed had the lowest number of significantly enriched GO terms (Eastern  
450 Finncattle, 111; Western Finncattle, 113; and Yakutian cattle, 95). This difference between the native  
451 Finnish cattle and Yakutian cattle can be due to the differences in the selection histories of these  
452 breeds.

#### 453 **Genomic characteristics of the northern Eurasian taurine cattle breeds**

454 The GO enrichment analysis of genes harboring >5 nsSNPs indicated that genes related, e.g., to  
455 immunity and “response to stimulus” are overrepresented in the set of genes identified in the northern  
456 Eurasian native cattle breeds in this study. “Response to stimulus” refers to a change in the state or  
457 activity of a cell or an organism as a result of the detection of a stimulus, e.g., a change in enzyme  
458 production or gene expression (Gene Ontology Browser). This observation was consistent with  
459 previous cattle resequencing analyses (Choi et al., 2014; Stafuzza et al., 2017; Mei et al., 2018) and  
460 suggests that these genes were under positive selection during the course of cattle evolution and  
461 provided survival benefits, e.g., during environmental changes (Nielsen et al., 2007). Moreover, we

462 observed similar GO terms in our transcriptome study that included northern Eurasian cattle breeds  
463 (Pokharel et al., 2018). Interestingly, genes related to the GO term “Sensory perception” were  
464 enriched in Eastern Finncattle and Western Finncattle but not Yakutian cattle. We performed a  
465 manual search for genes associated with “Sensory perception” genes. We found that 47 of these  
466 genes exhibited >5 nsSNPs in Eastern Finncattle and Western Finncattle, most of which were  
467 olfactory receptor genes. We determined the number of SNPs and nucleotide diversity of this set of  
468 genes and found that the Yakutian cattle exhibited less variation than the two Finnish native breeds  
469 (the number of SNPs and  $\pi$ -estimates for Eastern Finncattle, Western Finncattle and Yakutian cattle  
470 were 2,298 and  $1.864 \times 10e-3$ ; 2,091 and  $1.792 \times 10e-3$ ; 1,478 and  $1.113 \times 10e-3$ , respectively),  
471 which is in contrast to the number of SNPs and  $\pi$ -estimates obtained for the entire genomes of the  
472 breeds. Great variations in the number of olfactory receptor genes and structural variations in these  
473 genes among mammalian species and even individuals within species (e.g., in humans) have been  
474 interpreted as reflecting the effects of environmental factors on the genetic diversity of this multigene  
475 family and demonstrate the importance of these genes from the evolutionary point of view (Niimura,  
476 2011; Niimura et al., 2014). Therefore, we hypothesize that the reduced genetic diversity in the  
477 evolutionarily important genes in Yakutian cattle could be associated with gradual adaptation to the  
478 challenging subarctic environment along with human movements from the southern Siberian regions  
479 to more northern environment (Librado et al., 2015). Cattle (and horses) may have been introduced to  
480 the Yakutian region after the 9th century, perhaps as late as the 13th century (Kopoteva and Partanen,  
481 2009). Compared to European taurine cattle, this is a relatively short time period in terms of intervals  
482 between cattle generations. In our study, genes related to the GO term “Developmental growth” were  
483 enriched in only Yakutian cattle. (Stothard et al., 2011) suggested that genes associated with the GO  
484 term “Growth” may be related to the increase in the mass of intensively selected Black Angus (beef  
485 breed) and Holstein (dairy breed) cattle. However, Yakutian cattle have not been selected for  
486 increased body size as that would be less desirable characteristic in Yakutian conditions. Instead, we

487 hypothesize that the enrichment of these growth-related genes in Yakutian cattle may be a signature  
488 of adaptation to the harsh environment. The Yakutian cattle exhibit unique morphoanatomical  
489 adaptations to the subarctic climate and are characterized by their small live weights (adult cows  
490 typically weigh 350-400 kilograms, with heights of 110-112 centimeters); deep but relatively narrow  
491 chests; and short, firm legs (Kantanen et al., 2009a). The Yakutian cattle are unique remnants of the  
492 Siberian Turano-Mongolian type of taurine cattle (Kantanen et al., 2009a) and can be distinguished  
493 from the European humpless cattle by these anatomical characteristics.

494 We performed genome-wide selection-mapping scans for the three northern cattle breeds and found a  
495 great majority of SNPs exhibiting selection signatures in noncoding genomic regions. This finding  
496 indicates that selection occurs specifically via the regulatory elements of genomes (see also (Librado  
497 et al., 2015)). We found that the studied breeds exhibited ‘private’ (breed-specific) selection  
498 signature patterns, indicating distinctiveness in their selection histories. We further investigated the  
499 proportions of genes exhibiting selection signatures among the breeds and found that only 5 genes  
500 from this set of genes were shared by the three breeds. Only 37 genes were shared by the two Finnish  
501 native cattle breeds, while 13 ‘selection signature’ genes were shared by Western Finncattle and  
502 Yakutian cattle and 11 by Eastern Finncattle and Yakutian cattle. In addition, the breeds did not share  
503 any of the genes exhibiting the strongest selection signatures and harboring >5 nsSNPs, and the GO  
504 term enrichment analysis of this set of genes indicated that only one GO term (“GMP binding”) was  
505 significantly enriched in all three breeds.

506 We identified several positively selected candidate genes underlying adaptation, appearance and  
507 production of Eastern Finncattle, Western Finncattle and Yakutian cattle. For example, in Eastern  
508 Finncattle, selection signatures were detected in *NRAP* and *IGFBP5*, both of which have been  
509 previously identified as candidate genes for muscle development and meat quality in cattle (Williams  
510 et al., 2009), and in *NOD2*, which is a candidate gene for dairy production (Ogorevc et al., 2009). In

511 Western Finncattle, we detected selection signatures in, e.g., candidate genes for beef production,  
512 such as *COX5B* and *ITGB3* (Williams *et al.*, 2009), and dairy production, such as *CD14* (Ogorevc *et*  
513 *al.*, 2009). In Yakutian cattle, several genes exhibiting selection signatures were candidate genes for  
514 muscle development and meat quality, such as *COX7A1*, *THBS3*, *PFKM*, and *SOCS3* (Williams *et*  
515 *al.*, 2009) but also for color pattern (*ADAM17*; (Gutiérrez-Gil *et al.*, 2015)) and milk production traits  
516 (*MUC1*; (Ogorevc *et al.*, 2009)). We were particularly interested in the genomic adaptation to North  
517 Eurasian environments. (Cardona *et al.*, 2014) listed in the supplementary materials of their  
518 publication several potential candidate genes associated with biological processes and pathways  
519 hypothesized to be involved in cold adaptation in indigenous Siberian human populations in terms of  
520 response to temperature, blood pressure, basal metabolic rate, smooth muscle contraction and energy  
521 metabolism. Several of these genes also exhibited significant selection signatures in our cattle  
522 sequence data, as exemplified in the Results section of this paper. *SLC8A1* (sodium/calcium  
523 exchanger 1), influencing the oxidative stress response, is an example of the genes with significant  
524 selection signatures in Yakutian cattle, Siberian human populations (Cardona *et al.*, 2014) and native  
525 Yakutian horses (Librado *et al.*, 2015). This example of selection signatures and associated genes  
526 found in the Yakutian cattle and Siberian human populations (Cardona *et al.*, 2014) indicates  
527 convergent evolution between the mammalian populations adapted to subarctic environments.  
528 Convergent evolution between mammalian species in adaptation to harsh environments has also  
529 occurred, e.g., on the Tibetan plateau, as indicated by (Wang *et al.*, 2014a, 2015; Yang *et al.*, 2016).

## 530 **CONCLUSIONS**

531 We have investigated by whole-genome sequencing for the first time the genetic diversity of native  
532 cattle breeds originating from the northernmost region of cattle farming in the world. We found novel  
533 SNPs and indels and genes that have not yet been annotated. Our observations suggest that accurate  
534 reference genome assemblies are needed for genetically diverse native cattle breeds showing genetic

535 distinctiveness, such as Yakutian cattle, in order to better understand the genetic diversity of the  
536 breeds and the effects of natural and artificial selection and adaptation. We identified a number of  
537 genes and chromosomal regions important for the adaptation and production traits of the breeds.  
538 Moreover, GO terms such as defense response, growth, sensory perception and immune response  
539 were enriched in the genes associated with selective sweeps. To improve our knowledge of the value  
540 of native breeds as genetic resources for future cattle breeding and the power of selection signature  
541 analyses, a greater number of animals of these breeds should be investigated in a wider breed  
542 diversity context.

#### 543 **ABBREVIATIONS**

544 nsSNPs: nonsynonymous SNPs; GO: gene ontology; CLR: composite likelihood ratio; SFS: site  
545 frequency spectrum; PCA: principal component analysis; PSMC: pairwise sequentially Markovian  
546 coalescent;  $\partial a \partial i$ : diffusion approximation for demographic inference; Gb: gigabases

#### 547 **DATA AVAILABILITY**

548 The raw sequence reads (Fastq Files) for this study can be found in European Nucleotide Archive  
549 (ENA) under the accession number PRJEB28185 (please see Table S1 for sample specific  
550 accessions).

#### 551 **AUTHOR CONTRIBUTIONS**

552 JK designed the study, and revised the manuscript. MW performed the bioinformatics and statistical  
553 analyses and drafted the manuscript. JK, RP, IA and ZI collected the samples. RP, KP, IA, MY and  
554 ZI participated in the experimental design and paper revision. All authors read and approved the final  
555 manuscript.

#### 556 **FUNDING**



557 This work was supported by the Academy of Finland (the Arctic Ark—project no. 286040 in the  
558 ARKTIKO research program of the Academy of Finland), the Ministry of Agriculture and Forestry  
559 in Finland, and the Finnish Cultural Foundation. MW was partly supported by grants from the Betty  
560 Väänänen Foundation and Ella and Georg Ehrnrooth foundation, Doctoral School of University of  
561 Eastern Finland in Environmental Physics, Health and Biology.

## 562 **ACKNOWLEDGMENTS**

563 We thank Tuula-Marjatta Hamama for DNA extraction and BGI for sequencing the samples. The  
564 authors wish to acknowledge the CSC-IT Center for Science, Finland, for computational resources.  
565 The owners of the animals included in the study are acknowledged for providing samples for this  
566 study.

## 567 **REFERENCES**

- 568 Alachiotis, N., Stamatakis, A., and Pavlidis, P. (2012). OmegaPlus: a scalable tool for rapid detection  
569 of selective sweeps in whole-genome datasets. *Bioinformatics* 28, 2274–2275.  
570 doi:10.1093/bioinformatics/bts419.
- 571 Barnosky, A. D., Koch, P. L., Feranec, R. S., Wing, S. L., and Shabel, A. B. (2004). Assessing the  
572 Causes of Late Pleistocene Extinctions on the Continents. *Science* (80-. ). 306, 70. Available at:  
573 <http://science.sciencemag.org/content/306/5693/70.abstract>.
- 574 Bläuer, A., and Kantanen, J. (2013). Transition from hunting to animal husbandry in Southern,  
575 Western and Eastern Finland: new dated osteological evidence. *J. Archaeol. Sci.* 40, 1646–1666.  
576 doi:<http://dx.doi.org/10.1016/j.jas.2012.10.033>.
- 577 Boettcher, P. J., Tixier-Boichard, M., Toro, M. A., Simianer, H., Eding, H., Gandini, G., et al. (2010).  
578 Objectives, criteria and methods for using molecular genetic data in priority setting for

- 579 conservation of animal genetic resources. *Anim. Genet.* 41, 64–77. doi:10.1111/j.1365-  
580 2052.2010.02050.x.
- 581 Browning, S. R., and Browning, B. L. (2007). Rapid and Accurate Haplotype Phasing and Missing-  
582 Data Inference for Whole-Genome Association Studies By Use of Localized Haplotype  
583 Clustering. *Am. J. Hum. Genet.* 81, 1084–1097. Available at:  
584 <http://www.ncbi.nlm.nih.gov/pmc/articles/PMC2265661/>.
- 585 Cardona, A., Pagani, L., Antao, T., Lawson, D. J., Eichstaedt, C. A., Yngvadottir, B., et al. (2014).  
586 Genome-Wide Analysis of Cold Adaptation in Indigenous Siberian Populations. *PLoS One* 9,  
587 e98076. doi:10.1371/journal.pone.0098076.
- 588 Chen, N., Cai, Y., Chen, Q., Li, R., Wang, K., Huang, Y., et al. (2018). Whole-genome resequencing  
589 reveals world-wide ancestry and adaptive introgression events of domesticated cattle in East  
590 Asia. *Nat. Commun.* 9, 2337. doi:10.1038/s41467-018-04737-0.
- 591 Choi, J.-W., Liao, X., Park, S., Jeon, H.-J., Chung, W.-H., Stothard, P., et al. (2013). Massively  
592 Parallel Sequencing of Chikso (Korean Brindle Cattle) to Discover Genome-Wide SNPs and  
593 InDels. *Mol. Cells* 36, 203–211. doi:10.1007/s10059-013-2347-0.
- 594 Choi, J.-W., Liao, X., Stothard, P., Chung, W.-H., Jeon, H.-J., Miller, S. P., et al. (2014). Whole-  
595 Genome Analyses of Korean Native and Holstein Cattle Breeds by Massively Parallel  
596 Sequencing. *PLoS One* 9, e101127. Available at:  
597 <http://dx.doi.org/10.1371/journal.pone.0101127>.
- 598 Cramp, L. J. E., Jones, J., Sheridan, A., Smyth, J., Whelton, H., Mulville, J., et al. (2014). Immediate  
599 replacement of fishing with dairying by the earliest farmers of the northeast Atlantic  
600 archipelagos. *Proc. R. Soc. B Biol. Sci.* 281, 20132372. doi:10.1098/rspb.2013.2372.

- 601 DePristo, M. A., Banks, E., Poplin, R. E., Garimella, K. V., Maguire, J. R., Hartl, C., et al. (2011). A  
602 framework for variation discovery and genotyping using next-generation DNA sequencing data.  
603 *Nat. Genet.* 43, 491–498. doi:10.1038/ng.806.
- 604 Du, Z., Zhou, X., Ling, Y., Zhang, Z., and Su, Z. (2010). agriGO: a GO analysis toolkit for the  
605 agricultural community. *Nucleic Acids Res.* 38, W64–W70. doi:10.1093/nar/gkq310.
- 606 Egorov, E. G., Nikiforov, M. M., and Danilov, Y. G. (2015). Unique experience and achievements of  
607 sakha people in development of agriculture in the north. 9.
- 608 Felius, M. (1995). *Cattle Breeds, an Encyclopedia; Misset Uitgeverij: Doetinchem, The Netherlands.*
- 609 Flicek, P., Ahmed, I., Amode, M. R., Barrell, D., Beal, K., Brent, S., et al. (2013). Ensembl 2013.  
610 *Nucleic Acids Res.* 41, D48–D55. doi:10.1093/nar/gks1236.
- 611 Gao, Y., Gautier, M., Ding, X., Zhang, H., Wang, Y., Wang, X., et al. (2017). Species composition  
612 and environmental adaptation of indigenous Chinese cattle. *Sci. Rep.* 7, 16196.  
613 doi:10.1038/s41598-017-16438-7.
- 614 Groenen, M. A. M., Archibald, A. L., Uenishi, H., Tuggle, C. K., Takeuchi, Y., Rothschild, M. F., et  
615 al. (2012). Analyses of pig genomes provide insight into porcine demography and evolution.  
616 *Nature* 491, 393–398. doi:10.1038/nature11622.
- 617 Gutenkunst, R. N., Hernandez, R. D., Williamson, S. H., and Bustamante, C. D. (2009). Inferring the  
618 Joint Demographic History of Multiple Populations from Multidimensional SNP Frequency  
619 Data. *PLoS Genet* 5, e1000695. Available at:  
620 <http://dx.doi.org/10.1371/journal.pgen.1000695>.
- 621 Gutiérrez-Gil, B., Arranz, J. J., and Wiener, P. (2015). An interpretive review of selective sweep

- 622 studies in *Bos taurus* cattle populations: identification of unique and shared selection signals  
623 across breeds. *Front. Genet.* 6, 167. Available at:  
624 <https://www.frontiersin.org/article/10.3389/fgene.2015.00167>.
- 625 Hughes, P. D., Woodward, J. C., and Gibbard, P. L. (2007). Middle Pleistocene cold stage climates in  
626 the Mediterranean: New evidence from the glacial record. *Earth Planet. Sci. Lett.* 253, 50–56.  
627 doi:<https://doi.org/10.1016/j.epsl.2006.10.019>.
- 628 Iso-Touru, T., Tapio, M., Vilkki, J., Kiseleva, T., Ammosov, I., Ivanova, Z., et al. (2016). Genetic  
629 diversity and genomic signatures of selection among cattle breeds from Siberia, eastern and  
630 northern Europe. *Anim. Genet.* 47, 647–657. doi:10.1111/age.12473.
- 631 Kantanen, J., Ammosov, I., Li, M., Osva, A., and Popov, R. (2009a). “A cow of the permafrost,” in  
632 *Sakha Ynaga*: cattle of the Yakuts (Helsinki: Suomalaisen tiedekatemian toimituksia), 19–44.
- 633 Kantanen, J., Edwards, C. J., Bradley, D. G., Viinalass, H., Thessler, S., Ivanova, Z., et al. (2009b).  
634 Maternal and paternal genealogy of Eurasian taurine cattle (*Bos taurus*). *Heredity (Edinb)*. 103,  
635 404–415. Available at:  
636 <http://www.nature.com/hdy/journal/v103/n5/supinfo/hdy200968s1.html>.
- 637 Kantanen, J., Låvendahl, P., Strandberg, E., Eythorsdottir, E., Li, M.-H., Kettunen-PrÃbel, A., et al.  
638 (2015). Utilization of farm animal genetic resources in a changing agro-ecological environment  
639 in the Nordic countries. *Front. Genet.* 6, 52. doi:10.3389/fgene.2015.00052.
- 640 Kantanen, J., Olsaker, I., Holm, L.-E., Lien, S., Vilkki, J., Brusgaard, K., et al. (2000). Genetic  
641 diversity and population structure of 20 north European cattle breeds. *J. Hered.* 91, 446–457.  
642 doi:10.1093/jhered/91.6.446.
- 643 Kawahara-Miki, R., Tsuda, K., Shiwa, Y., Arai-Kichise, Y., Matsumoto, T., Kanasaki, Y., et al.

- 644 (2011). Whole-genome resequencing shows numerous genes with nonsynonymous SNPs in the  
645 Japanese native cattle Kuchinoshima-Ushi. *BMC Genomics* 12, 103. Available at:  
646 <http://www.biomedcentral.com/1471-2164/12/103>.
- 647 Kim, J., Hanotte, O., Mwai, O. A., Dessie, T., Bashir, S., Diallo, B., et al. (2017). The genome  
648 landscape of indigenous African cattle. *Genome Biol.* 18, 34. doi:10.1186/s13059-017-1153-y.
- 649 Kinsella, R. J., KÃ¶hÃ¶ri, A., Haider, S., Zamora, J., Proctor, G., Spudich, G., et al. (2011). Ensembl  
650 BioMarts: a hub for data retrieval across taxonomic space. *Database* 2011, bar030-bar030.  
651 Available at: <http://dx.doi.org/10.1093/database/bar030>.
- 652 Kopoteva, I., and Partanen, U. (2009). “Sakha Ynaga: Cattle of the Yakuts.,” in *A historical*  
653 *excursion to Northern Sakha.*, eds. J. Granberg, K. Soini, and J. Kantanen (Helsinki:  
654 Suomalainen Tiedeakatemia), 75–116.
- 655 Kumar, S., and Subramanian, S. (2002). Mutation rates in mammalian genomes. *Proc. Natl. Acad.*  
656 *Sci.* 99, 803–808. doi:10.1073/pnas.022629899.
- 657 Lachance, J., Vernot, B., Elbers, C. C., Ferwerda, B., Froment, A., Bodo, J.-M., et al. (2012).  
658 Evolutionary history and adaptation from high-coverage whole-genome sequences of diverse  
659 African hunter-gatherers. *Cell* 150, 457–469. doi:10.1016/j.cell.2012.07.009.
- 660 Li, H., and Durbin, R. (2011). Inference of human population history from individual whole-genome  
661 sequences. *Nature* 475, 493–496. Available at:  
662 [http://www.nature.com/nature/journal/v475/n7357/abs/nature10231.html#supplementary-](http://www.nature.com/nature/journal/v475/n7357/abs/nature10231.html#supplementary-information)  
663 [information.](http://www.nature.com/nature/journal/v475/n7357/abs/nature10231.html#supplementary-information)
- 664 Li, H., Handsaker, B., Wysoker, A., Fennell, T., Ruan, J., Homer, N., et al. (2009). The Sequence  
665 Alignment/Map format and SAMtools. *Bioinformatics* 25, 2078–2079.

- 666 doi:10.1093/bioinformatics/btp352.
- 667 Li, M.-H., and Kantanen, J. (2010). Genetic structure of Eurasian cattle (*Bos taurus*) based on  
668 microsatellites: clarification for their breed classification. *Anim. Genet.* 41, 150–158.  
669 doi:10.1111/j.1365-2052.2009.01980.x.
- 670 Li, M., Tapio, I., Vilkki, J., Ivanova, Z., Kiselyova, T., Marzanov, N., et al. (2007). The genetic  
671 structure of cattle populations (*Bos taurus*) in northern Eurasia and the neighbouring Near  
672 Eastern regions: implications for breeding strategies and conservation. *Mol. Ecol.* 16, 3839–  
673 3853. doi:10.1111/j.1365-294X.2007.03437.x.
- 674 Li, M., Tian, S., Yeung, C. K. L., Meng, X., Tang, Q., Niu, L., et al. (2014). Whole-genome  
675 sequencing of Berkshire (European native pig) provides insights into its origin and  
676 domestication. *Sci.Rep.* 4. Available at: <http://10.0.4.14/srep04678>.
- 677 Librado, P., Der Sarkissian, C., Ermini, L., Schubert, M., Jónsson, H., Albrechtsen, A., et al. (2015).  
678 Tracking the origins of Yakutian horses and the genetic basis for their fast adaptation to  
679 subarctic environments. *Proc. Natl. Acad. Sci.* 112, E6889–E6897.  
680 doi:10.1073/pnas.1513696112.
- 681 Librado, P., Fages, A., Gaunitz, C., Leonardi, M., Wagner, S., Khan, N., et al. (2016). The  
682 Evolutionary Origin and Genetic Makeup of Domestic Horses. *Genetics* 204, 423–434.  
683 doi:10.1534/genetics.116.194860.
- 684 Liu, S., Lorenzen, E. D., Fumagalli, M., Li, B., Harris, K., Xiong, Z., et al. (2014). Population  
685 Genomics Reveal Recent Speciation and Rapid Evolutionary Adaptation in Polar Bears. *Cell*  
686 157, 785–794. doi:10.1016/j.cell.2014.03.054.
- 687 MacLeod, I. M., Larkin, D. M., Lewin, H. A., Hayes, B. J., and Goddard, M. E. (2013). Inferring

- 688 Demography from Runs of Homozygosity in Whole-Genome Sequence, with Correction for  
689 Sequence Errors. *Mol. Biol. Evol.* 30, 2209–2223. doi:10.1093/molbev/mst125.
- 690 Malke, H. (1990). J. SAMBROCK, E. F. FRITSCH and T. MANIATIS, Molecular Cloning, A  
691 Laboratory Manual (Second Edition), Volumes 1, 2 and 3. 1625 S., zahlreiche Abb. und Tab.  
692 Cold Spring Harbor 1989. Cold Spring Harbor Laboratory Press. \$ 115.00. ISBN: 0-87969-309-  
693 6. *J. Basic Microbiol.* 30, 623. doi:10.1002/jobm.3620300824.
- 694 McKenna, A., Hanna, M., Banks, E., Sivachenko, A., Cibulskis, K., Kernytsky, A., et al. (2010). The  
695 Genome Analysis Toolkit: A MapReduce framework for analyzing next-generation DNA  
696 sequencing data. *Genome Res.* 20, 1297–1303. doi:10.1101/gr.107524.110.
- 697 McManus, K. F., Kelley, J. L., Song, S., Veeramah, K. R., Woerner, A. E., Stevison, L. S., et al.  
698 (2015). Inference of Gorilla Demographic and Selective History from Whole-Genome Sequence  
699 Data. *Mol. Biol. Evol.* 32, 600–612. doi:10.1093/molbev/msu394.
- 700 Mei, C., Wang, H., Liao, Q., Wang, L., Cheng, G., Wang, H., et al. (2018). Genetic Architecture and  
701 Selection of Chinese Cattle Revealed by Whole Genome Resequencing. *Mol. Biol. Evol.* 35,  
702 688–699. doi:10.1093/molbev/msx322.
- 703 Murray, C., Huerta-Sanchez, E., Casey, F., and Bradley, D. G. (2010). Cattle demographic history  
704 modelled from autosomal sequence variation. *Philos. Trans. R. Soc. London B Biol. Sci.* 365,  
705 2531–2539. Available at: <http://rstb.royalsocietypublishing.org/content/365/1552/2531.abstract>.
- 706 Nielsen, R., Hellmann, I., Hubisz, M., Bustamante, C., and Clark, A. G. (2007). Recent and ongoing  
707 selection in the human genome. *Nat. Rev. Genet.* 8, 857–868. doi:10.1038/nrg2187.
- 708 Niimura, Y. (2011). Olfactory Receptor Multigene Family in Vertebrates: From the Viewpoint of  
709 Evolutionary Genomics. *Curr. Genomics* 13, 103–114. doi:10.2174/138920212799860706.

- 710 Niimura, Y., Matsui, A., and Touhara, K. (2014). Extreme expansion of the olfactory receptor gene  
711 repertoire in African elephants and evolutionary dynamics of orthologous gene groups in 13  
712 placental mammals. *Genome Res.* 24, 1485–1496. doi:10.1101/gr.169532.113.
- 713 Odegård, J., Yazdi, M. H., Sonesson, A. K., and Meuwissen, T. H. E. (2009). Incorporating desirable  
714 genetic characteristics from an inferior into a superior population using genomic selection.  
715 *Genetics* 181, 737–45. doi:10.1534/genetics.108.098160.
- 716 Ogorevc, J., Kunej, T., Razpet, A., and Dovc, P. (2009). Database of cattle candidate genes and  
717 genetic markers for milk production and mastitis. *Anim. Genet.* 40, 832–851.  
718 doi:10.1111/j.1365-2052.2009.01921.x.
- 719 Patterson, N., Price, A. L., and Reich, D. (2006). Population Structure and Eigenanalysis. *PLoS*  
720 *Genet* 2, e190. Available at: <http://dx.plos.org/10.1371%2Fjournal.pgen.0020190>.
- 721 Pavlidis, P., Živkovic, D., Stamatakis, A., and Alachiotis, N. (2013). SweeD: Likelihood-Based  
722 Detection of Selective Sweeps in Thousands of Genomes. *Mol. Biol. Evol.* 30, 2224–2234.  
723 doi:10.1093/molbev/mst112.
- 724 Pokharel, K., Weldenegodguad, M., Popov, R., Honkatukia, M., Huuki, H., Lindeberg, H., et al.  
725 (2018). Whole blood transcriptome analysis reveals footprints of cattle adaptation to sub-arctic  
726 conditions. *bioRxiv*, 379925. doi:10.1101/379925.
- 727 Purać, J., Pond, D. W., Grubor-Lajšić, G., Kojić, D., Blagojević, D. P., Worland, M. R., et al. (2011).  
728 Cold hardening induces transfer of fatty acids between polar and nonpolar lipid pools in the  
729 Arctic collembollan *Megaphorura arctica*. *Physiol. Entomol.* 36, 135–140. doi:10.1111/j.1365-  
730 3032.2010.00772.x.
- 731 Sasaki, Y., Nagai, K., Nagata, Y., Doronbekov, K., Nishimura, S., Yoshioka, S., et al. (2006).



- 732 Exploration of genes showing intramuscular fat deposition-associated expression changes in  
733 musculus longissimus muscle. *Anim. Genet.* 37, 40–46. doi:10.1111/j.1365-2052.2005.01380.x.
- 734 Stafuzza, N. B., Zerlotini, A., Lobo, F. P., Yamagishi, M. E. B., Chud, T. C. S., Caetano, A. R., et al.  
735 (2017). Single nucleotide variants and InDels identified from whole-genome re-sequencing of  
736 Guzerat, Gyr, Girolando and Holstein cattle breeds. *PLoS One* 12, e0173954. Available at:  
737 <https://doi.org/10.1371/journal.pone.0173954>.
- 738 Stajich, J. E., Block, D., Boulez, K., Brenner, S. E., Chervitz, S. A., Dagdigian, C., et al. (2002). The  
739 Bioperl Toolkit: Perl Modules for the Life Sciences. *Genome Res.* 12, 1611–1618.  
740 doi:10.1101/gr.361602.
- 741 Stothard, P., Choi, J.-W., Basu, U., Sumner-Thomson, J. M., Meng, Y., Liao, X., et al. (2011). Whole  
742 genome resequencing of black Angus and Holstein cattle for SNP and CNV discovery. *BMC*  
743 *Genomics* 12, 559. doi:10.1186/1471-2164-12-559.
- 744 Szyda, J., FrÄ...szczak, M., Mielczarek, M., Giannico, R., Minozzi, G., Nicolazzi, E. L., et al.  
745 (2015). The assessment of inter-individual variation of whole-genome DNA sequence in 32  
746 cows. *Mamm. Genome* 26, 658–665. doi:10.1007/s00335-015-9606-7.
- 747 Tsuda, K., Kawahara-Miki, R., Sano, S., Imai, M., Noguchi, T., Inayoshi, Y., et al. (2013). Abundant  
748 sequence divergence in the native Japanese cattle Mishima-Ushi (*Bos taurus*) detected using  
749 whole-genome sequencing. *Genomics* 102, 372–378. doi:10.1016/j.ygeno.2013.08.002.
- 750 Van der Auwera A., G., Carneiro, M. O., Hartl, C., Poplin, R., del Angel, G., Levy-Moonshine, A., et  
751 al. (2013). From FastQ data to high confidence variant calls: the Genome Analysis Toolkit best  
752 practices pipeline. *Curr. Protoc. Bioinforma. / Ed. board, Andreas D.Baxevanis ...[et al.]* 11,  
753 11.10.1-11.10.33. doi:10.1002/0471250953.bi1110s43.

- 754 Wang, G.-D., Fan, R.-X., Zhai, W., Liu, F., Wang, L., Zhong, L., et al. (2014a). Genetic  
755 Convergence in the Adaptation of Dogs and Humans to the High-Altitude Environment of the  
756 Tibetan Plateau. *Genome Biol. Evol.* 6, 2122–2128. Available at:  
757 <http://dx.doi.org/10.1093/gbe/evu162>.
- 758 Wang, K., Li, M., and Hakonarson, H. (2010). ANNOVAR: functional annotation of genetic variants  
759 from high-throughput sequencing data. *Nucleic Acids Res.* 38, e164–e164.  
760 doi:10.1093/nar/gkq603.
- 761 Wang, M.-S., Li, Y., Peng, M.-S., Zhong, L., Wang, Z.-J., Li, Q.-Y., et al. (2015). Genomic Analyses  
762 Reveal Potential Independent Adaptation to High Altitude in Tibetan Chickens. *Mol. Biol. Evol.*  
763 32, 1880–1889. Available at: <http://dx.doi.org/10.1093/molbev/msv071>.
- 764 Wang, M., Yu, Y., Haberer, G., Marri, P. R., Fan, C., Goicoechea, J. L., et al. (2014b). The genome  
765 sequence of African rice (*Oryza glaberrima*) and evidence for independent domestication. *Nat.*  
766 *Genet.* 46, 982–988. Available at: <http://10.0.4.14/ng.3044>.
- 767 Watanabe, N., Satoh, Y., Fujita, T., Ohta, T., Kose, H., Muramatsu, Y., et al. (2011). Distribution of  
768 allele frequencies at TTN g.231054C > T, RPL27A g.3109537C > T and AKIRIN2 c.\*188G >  
769 A between Japanese Black and four other cattle breeds with differing historical selection for  
770 marbling. *BMC Res. Notes* 4, 10. Available at: <http://www.biomedcentral.com/1756-0500/4/10>.
- 771 Williams, J. L., Dunner, S., Valentini, A., Mazza, R., Amarger, V., Checa, M. L., et al. (2009).  
772 Discovery, characterization and validation of single nucleotide polymorphisms within 206  
773 bovine genes that may be considered as candidate genes for beef production and quality. *Anim.*  
774 *Genet.* 40, 486–491. doi:10.1111/j.1365-2052.2009.01874.x.
- 775 Yang, J., Li, W.-R., Lv, F.-H., He, S.-G., Tian, S.-L., Peng, W.-F., et al. (2016). Whole-Genome

- 776 Sequencing of Native Sheep Provides Insights into Rapid Adaptations to Extreme  
777 Environments. *Mol. Biol. Evol.* 33, 2576–2592. doi:10.1093/molbev/msw129.
- 778 Yokoyama, Y., Lambeck, K., De Deckker, P., Johnston, P., and Fifield, L. K. (2000). Timing of the  
779 Last Glacial Maximum from observed sea-level minima. *Nature* 406, 713. Available at:  
780 <http://10.0.4.14/35021035>.
- 781 Zhang, H., Pajmans, J. L. A., Chang, F., Wu, X., Chen, G., Lei, C., et al. (2013). Morphological and  
782 genetic evidence for early Holocene cattle management in northeastern China. *Nat. Commun.* 4,  
783 2755. Available at: <http://10.0.4.14/ncomms3755>.
- 784 Zhao, S., Zheng, P., Dong, S., Zhan, X., Wu, Q., Guo, X., et al. (2013). Whole-genome sequencing  
785 of giant pandas provides insights into demographic history and local adaptation. *Nat. Genet.* 45,  
786 67–71. Available at:  
787 <http://www.nature.com/ng/journal/v45/n1/abs/ng.2494.html#supplementary-information>.
- 788 Zimin, A., Delcher, A., Florea, L., Kelley, D., Schatz, M., Puiu, D., et al. (2009). A whole-genome  
789 assembly of the domestic cow, *Bos taurus*. *Genome Biol.* 10, R42. Available at:  
790 <http://genomebiology.com/2009/10/4/R42>.

791 FIGURES

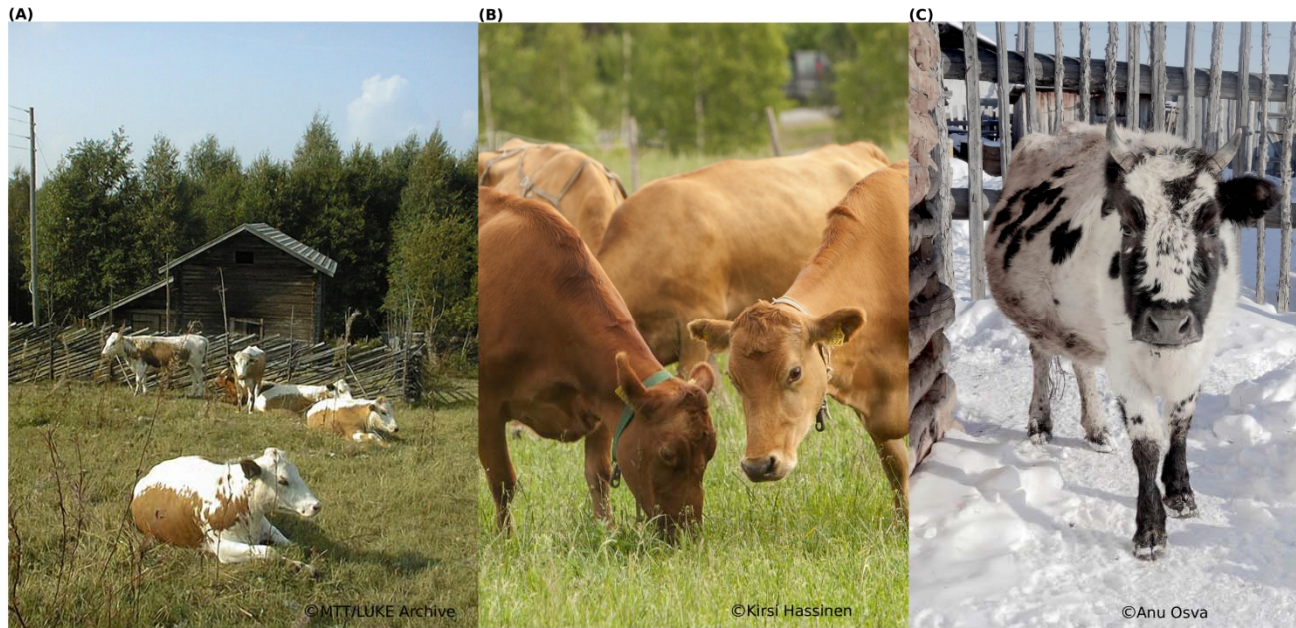

792

793 **Figure 1.** Three North Eurasian native cattle breeds are included in this study. **(A)** Eastern Finncattle

794 are typically red-sided and polled. Cattle breeding in Finland was started with this breed, and the

795 breed's herd book was established in 1898. The breed was threatened with extinction in the 1970s

796 and 1980s. The current census size is 1,600 cows, and the annual milk yield on average 4,000 Kgs.

797 **(B)** Western Finncattle are solid light or dark brown and polled. The breed is one of the most

798 productive native cattle breeds: the average annual milk yield is about 7,000 Kgs. **(C)** The Yakutian

799 cattle are characterized by being purebred aboriginal native cattle from Sakha. Adult Yakutian cows

800 weigh typically 350-400 Kgs and their height at the withers is 110-112cm on average. The animals

801 are well adapted to Siberian harsh conditions where the temperature falls below  $-50^{\circ}\text{C}$  in long

802 winters. The average annual milk yield is 1,000 Kgs. Please do not copy, use or upload the

803 photographs without permission of the copyright holders.

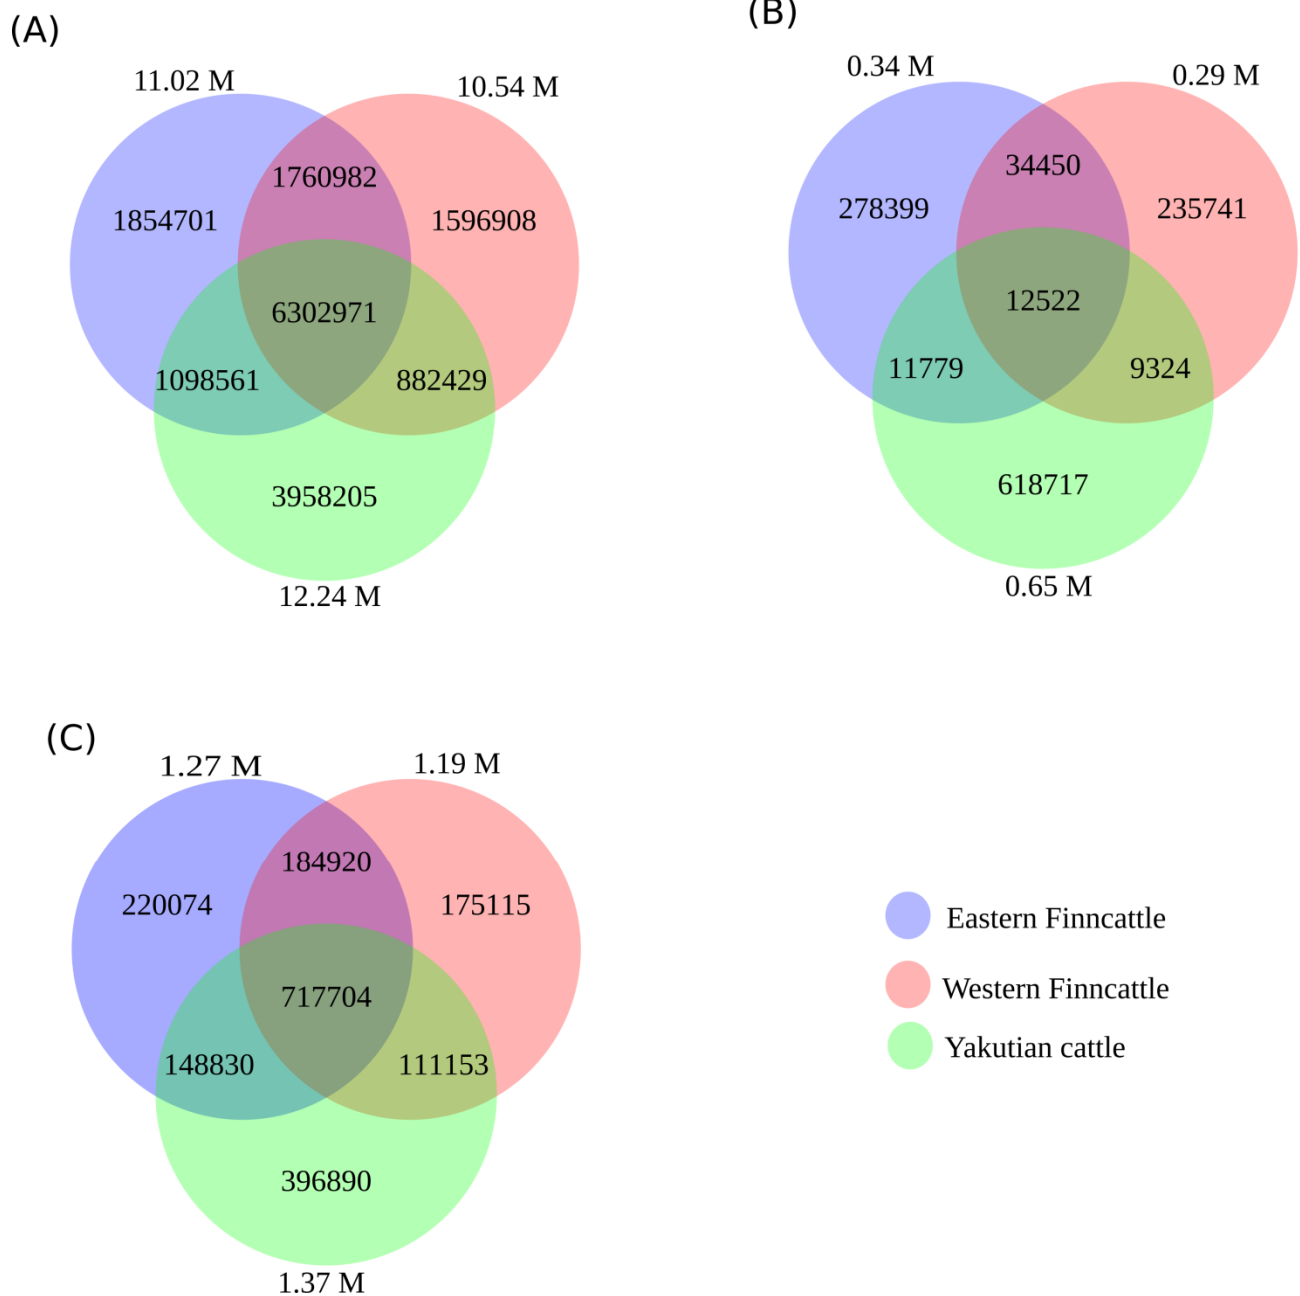

804

805 **Figure 2.** Venn diagram showing overlapping and unique SNPs/indels between the three breeds  
 806 (Eastern Finncattle, Western Finncattle and Yakutian). The numbers in parentheses outside the  
 807 circles are the total number of detected SNPs from each breed. The numbers in the circle components  
 808 show specific SNPs for each breed or overlapping SNPs/indels between any two breeds or among  
 809 three breeds. **(A)** The identified shared and specific SNPs for each breed, **(B)** the identified shared

810 and specific novel SNPs for each breed, and (C) the identified shared and specific indels for each  
 811 breed.

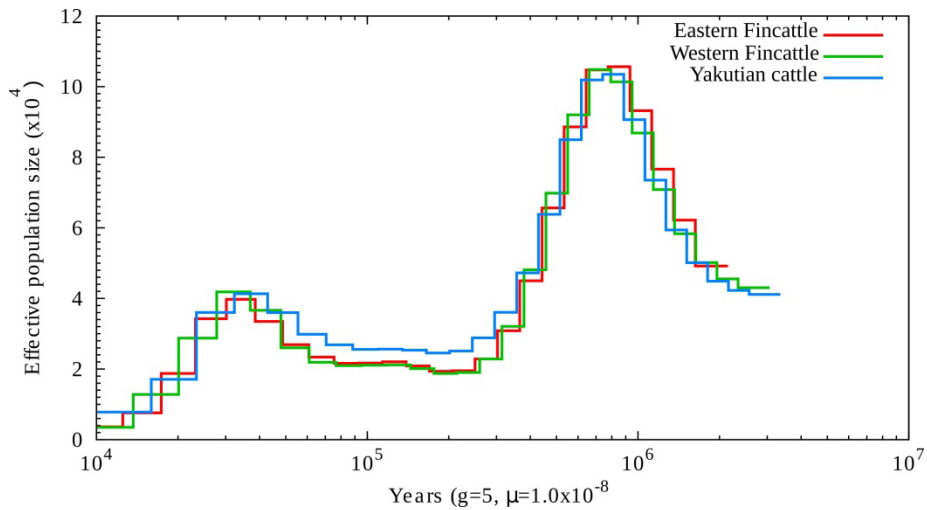

812  
 813 **Figure 3** Demographic history of the northernmost cattle breed reconstructed from three cattle  
 814 genomes, one from each breed, by using PSMC. The X axis shows the time in thousand years (Kyr),  
 815 and the Y axis shows the effective population size.

816 **TABLES**

817 **Table 1.** Summary of sequencing and short read alignment results

|                                                    | Eastern<br>Finncattle | Western<br>Finncattle | Yakutian<br>cattle | Overall<br>sample |
|----------------------------------------------------|-----------------------|-----------------------|--------------------|-------------------|
| Number of individuals                              | 5                     | 5                     | 5                  | 15                |
| Paired-end length (bp)                             | 100                   | 100                   | 100                | 100               |
| Average reads per individual                       | 352.73 M              | 347.14 M              | 342.33 M           | 347.4 M           |
| Average sequence depth per individual <sup>a</sup> | 13.21X                | 13.00X                | 12.82X             | 13.01X            |
| Average map reads per individual                   | 348.42 M              | 340.12 M              | 337.50 M           | 342,02 M          |
| Average unique map reads per individual            | 316.89 M              | 312.58 M              | 309.19 M           | 312.88 M          |
| Average read mapping rate                          | 98.78%                | 97.97%                | 98.59%             | 98.45%            |

|                       |        |        |        |        |
|-----------------------|--------|--------|--------|--------|
| Average coverage rate | 98.42% | 98.22% | 98.46% | 98.37% |
|-----------------------|--------|--------|--------|--------|

818 <sup>a</sup>Average sequence depth per individual was computed by dividing the clean reads by the reference  
 819 genome size.

820 **Table 2.** Functional annotation of the detected SNPs and indels

|                      |                                         | <b>Eastern<br/>Finncattle</b> | <b>Western<br/>Finncattle</b> | <b>Yakutian<br/>cattle</b> |
|----------------------|-----------------------------------------|-------------------------------|-------------------------------|----------------------------|
| <b>S<br/>N<br/>P</b> | <b>Total number of SNPs</b>             | 11,017,215                    | 10,543,290                    | 12,242,166                 |
|                      | <b>Intergenic</b>                       | 7,998,914                     | 7,662,604                     | 8,845,911                  |
|                      | <b>Intronic</b>                         | 2,764,951                     | 2,643,821                     | 3,114,622                  |
|                      | <b>Exonic<sup>a</sup></b>               |                               |                               |                            |
|                      | Nonsynonymous                           | 30,982                        | 28,733                        | 32,782                     |
|                      | Stop gain                               | 294                           | 284                           | 310                        |
|                      | Stop loss                               | 23                            | 18                            | 19                         |
|                      | Synonymous                              | 41,111                        | 38,137                        | 46,950                     |
|                      | <b>Upstream</b>                         | 74,552                        | 69,369                        | 82,170                     |
|                      | <b>Downstream</b>                       | 74,198                        | 70,815                        | 83,549                     |
|                      | <b>Upstream; downstream<sup>b</sup></b> | 1,636                         | 1,534                         | 2,036                      |
|                      | <b>UTR<sup>c</sup></b>                  | 25,545                        | 23,342                        | 28,273                     |
| <b>Splicing</b>      | 417                                     | 388                           | 459                           |                            |
| <b>ncRNA</b>         | 4,593                                   | 4,256                         | 5,086                         |                            |
| <b>I</b>             | <b>Total number of indels</b>           | 1,275,128                     | 1,188,892                     | 1,374,577                  |
|                      | <b>Intergenic</b>                       | 942,143                       | 878,007                       | 1,012,733                  |

|                            |                                         |         |         |         |
|----------------------------|-----------------------------------------|---------|---------|---------|
| <b>n<br/>d<br/>e<br/>l</b> | <b>Intronic</b>                         | 332,504 | 310,089 | 363,783 |
|                            | <b>Exonic<sup>a</sup></b>               |         |         |         |
|                            | Nonframeshift                           | 397     | 327     | 427     |
|                            | Stop gain                               | 24      | 22      | 27      |
|                            | Stop loss                               | 1       | 1       | 0       |
|                            | Frameshift                              | 1,045   | 972     | 1,148   |
|                            | <b>Upstream</b>                         | 9,269   | 8,286   | 9,861   |
|                            | <b>Downstream</b>                       | 10,611  | 9,609   | 11,377  |
|                            | <b>Upstream; downstream<sup>b</sup></b> | 250     | 218     | 282     |
|                            | <b>UTR<sup>c</sup></b>                  | 3,380   | 3,101   | 3,767   |
| <b>Splicing</b>            | 248                                     | 233     | 268     |         |
| <b>ncRNA</b>               | 406                                     | 371     | 437     |         |

821 <sup>a</sup>Exonic = “exonic” and “exonic; splicing” as annotated by ANNOVAR

822 <sup>b</sup>Upstream; downstream = variant located in downstream and upstream regions

823 <sup>c</sup>UTR = “UTR3” and “UTR5” as annotated by ANNOVAR
